# Supplementary material for: Converting commercial-grade silicone into a vitrimer using elemental sulfur
Source: Royal Society of Chemistry journal article supplement (doi:10.1039/d4ma00297k), 2024-01-01
Supplement: d4ma00297k1.pdf [file d4ma00297k1.pdf]

## Supporting Information

### Converting commercial-grade silicone into a vitrimer using elemental sulfur

**Mahsaalsadat Rokni,<sup>ab</sup> Kun Woo Park,<sup>ab</sup> Ringo Leung,<sup>ac</sup> Zoran Zujovic,<sup>ad</sup> and Erin M Leitao<sup>ab\*</sup>**

*<sup>a</sup> School of Chemical Sciences, The University of Auckland, 1010, New Zealand*

*E-mail: erin.leitao@auckland.ac.nz*

*<sup>b</sup> The MacDiarmid Institute for Advanced Materials and Nanotechnology, New Zealand*

*<sup>c</sup> Centre for Advanced materials Manufacturing and Design, Department of Mechanical and Mechatronics Engineering, The University of Auckland, 1023, New Zealand*

*<sup>d</sup> Institute of General and Physical Chemistry, Studentski Trg 12/5, 1100, Belgrade, Republic of Serbia*

#### **S1. Quantitative analysis of commercial silicone**

For Part A, the integration for the terminal vinyl groups was normalised to 6 (6H). The methyl hydrogens integrated to 110.76, so once divided by the normalised value of 6 (2Me/Si), indicated the presence of a total 18 methyl groups. This led to the identification of a  $DP_n$  of 16 when considering the terminal ends both likely contain a vinyl substituent and 2 methyl substituents.

For Part B, the vinyl group integration was similarly normalised to 6 for consistency. From this, it was concluded that there were four hydrogens corresponding to four units of -O-SiHMe. The integration corresponding to the methyl substituents from Part A was subtracted from Part B's total, isolating the methyl substituents corresponding to the PHMS-co-PDMS in Part B. Once this value was divided by 3, it revealed there were 30 methyl groups. Taking into account 4 of these methyl groups associated with the -O-SiHMe groups and the 2 terminal methyl groups, it was determined that Part B contains 12 repeating PDMS units as show in the structures below.

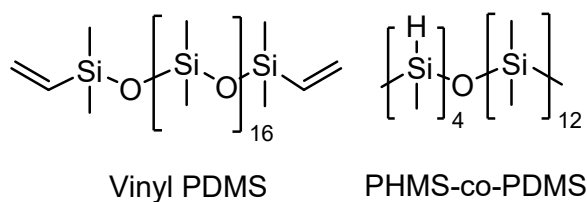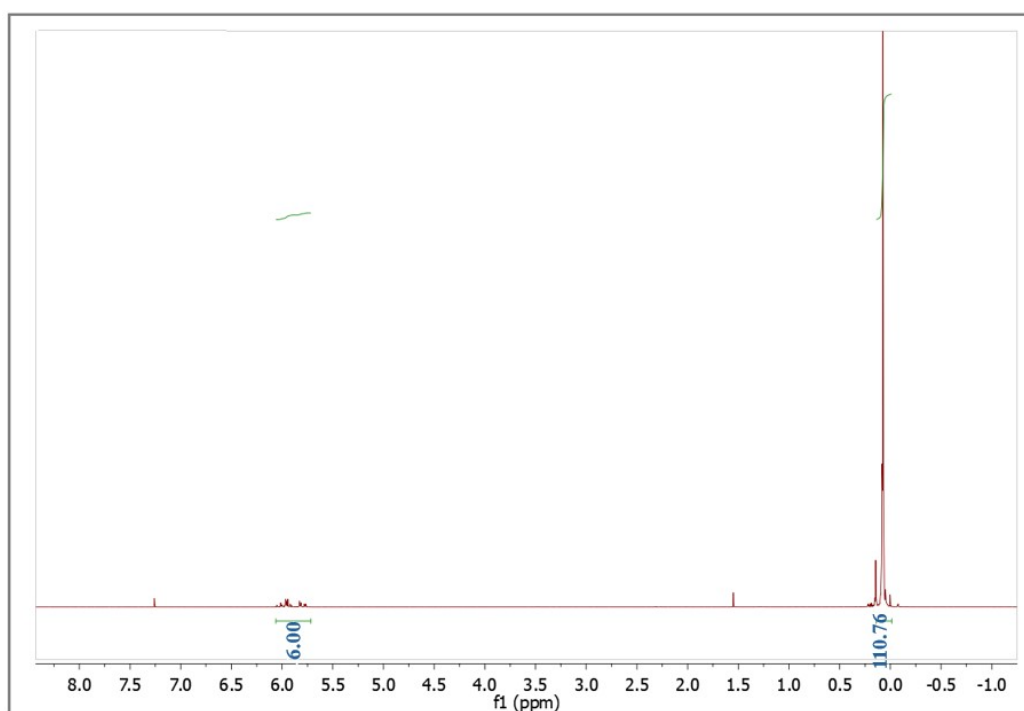

**Figure S1.** <sup>1</sup>H NMR spectrum of Gelest elastomer Part A, in CDCl<sub>3</sub>

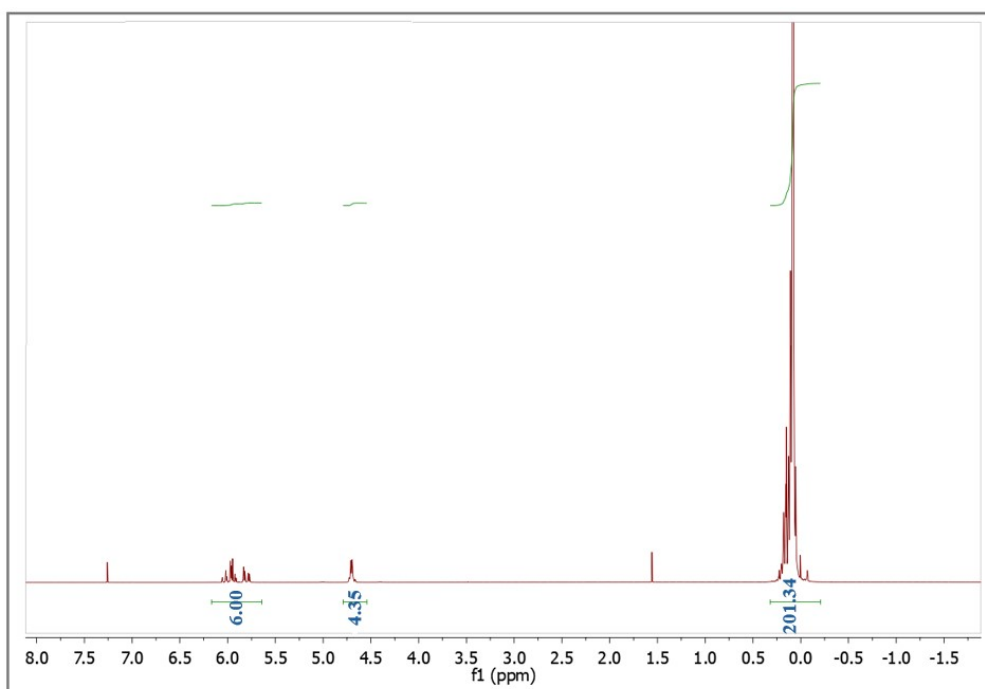

**Figure S2.**  $^1\text{H}$  NMR spectrum of Gelest elastomer Part B, in  $\text{CDCl}_3$

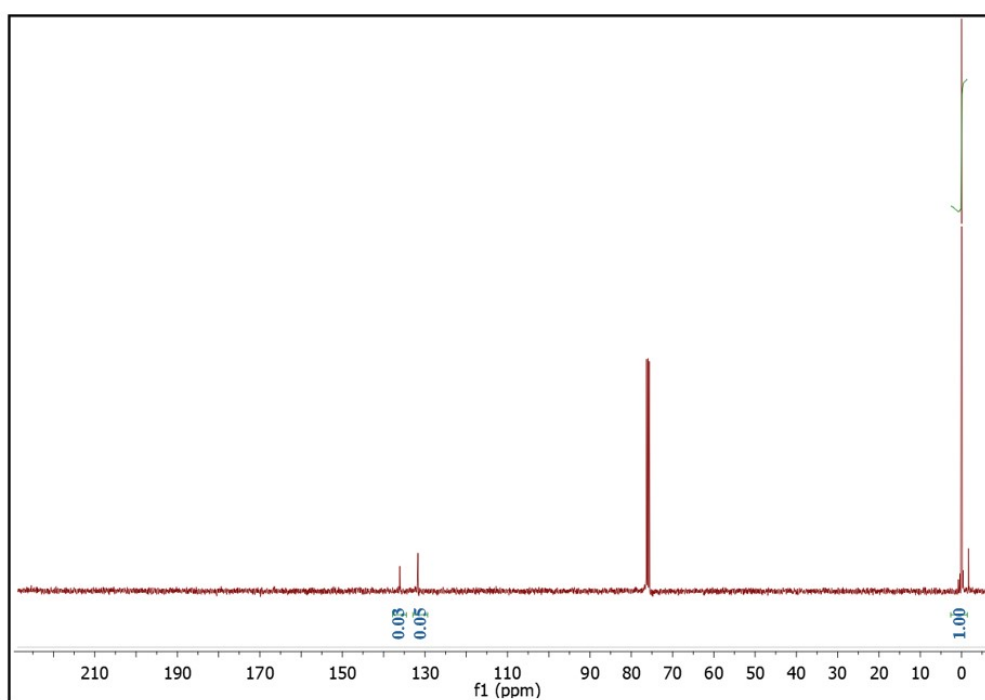

**Figure S3.**  $^{13}\text{C}\{^1\text{H}\}$  NMR spectrum of Gelest elastomer Part A, in  $\text{CDCl}_3$

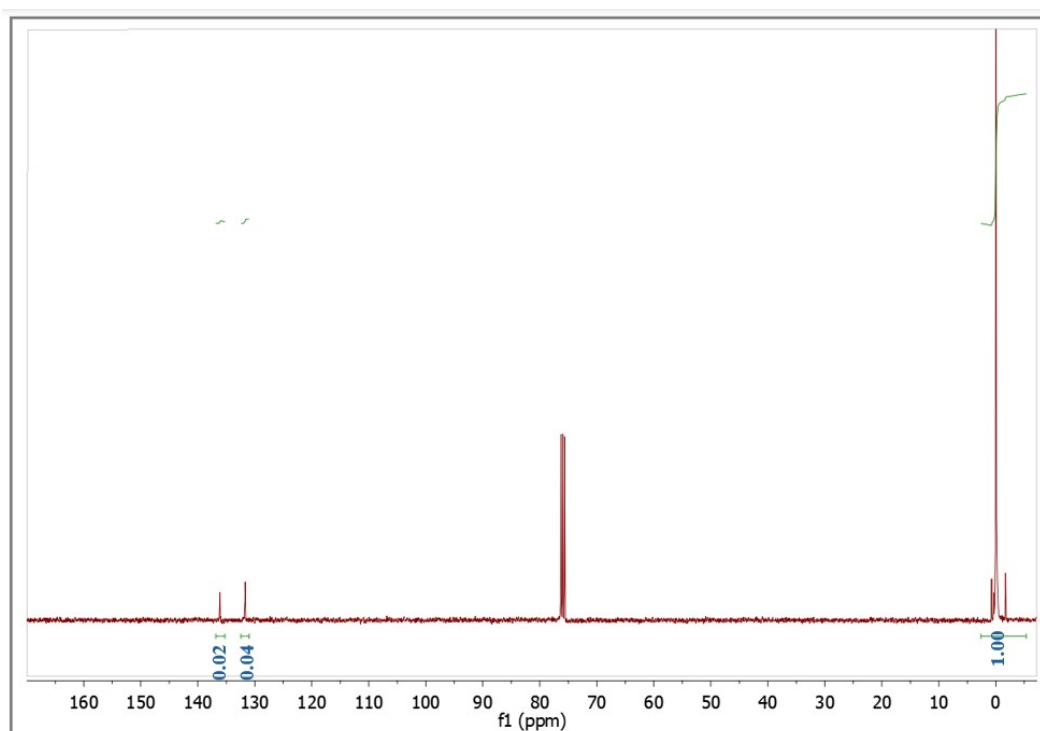

**Figure S4.**  $^{13}\text{C}\{^1\text{H}\}$  NMR spectrum of Gelest elastomer Part B, in  $\text{CDCl}_3$ .

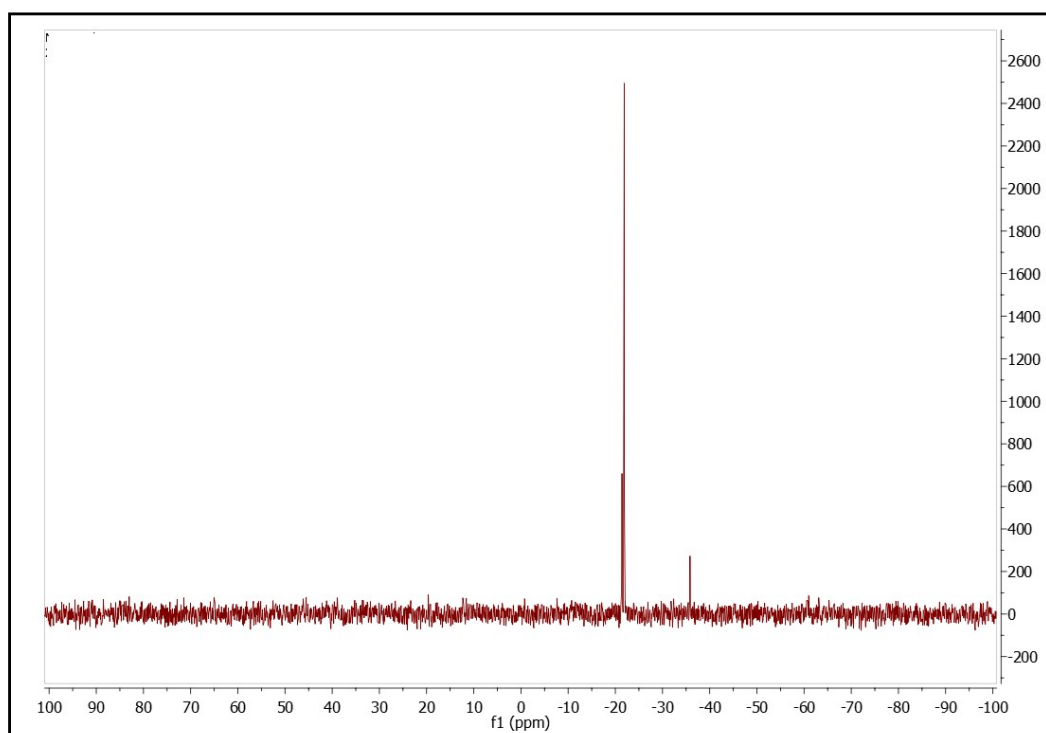

**Figure S5.**  $^{29}\text{Si}$  NMR spectrum of Gelest elastomer Part A, in  $\text{CDCl}_3$ .

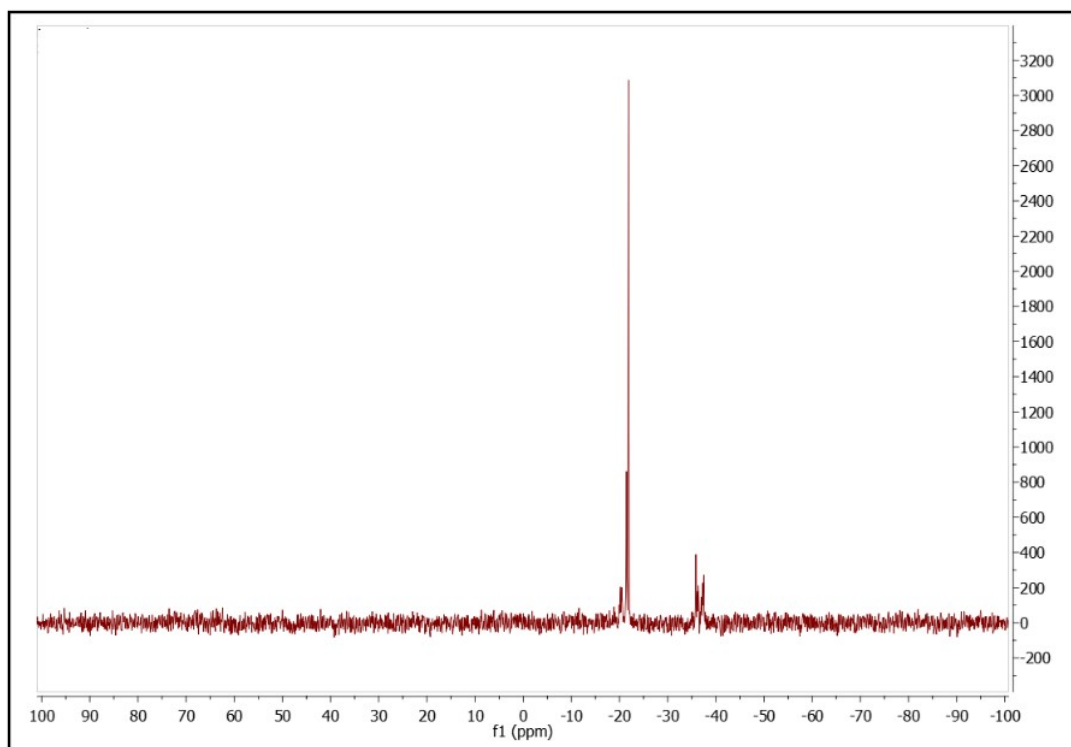

**Figure S6.**  $^{29}\text{Si}$  NMR spectrum of Gelest elastomer Part B, in  $\text{CDCl}_3$ .

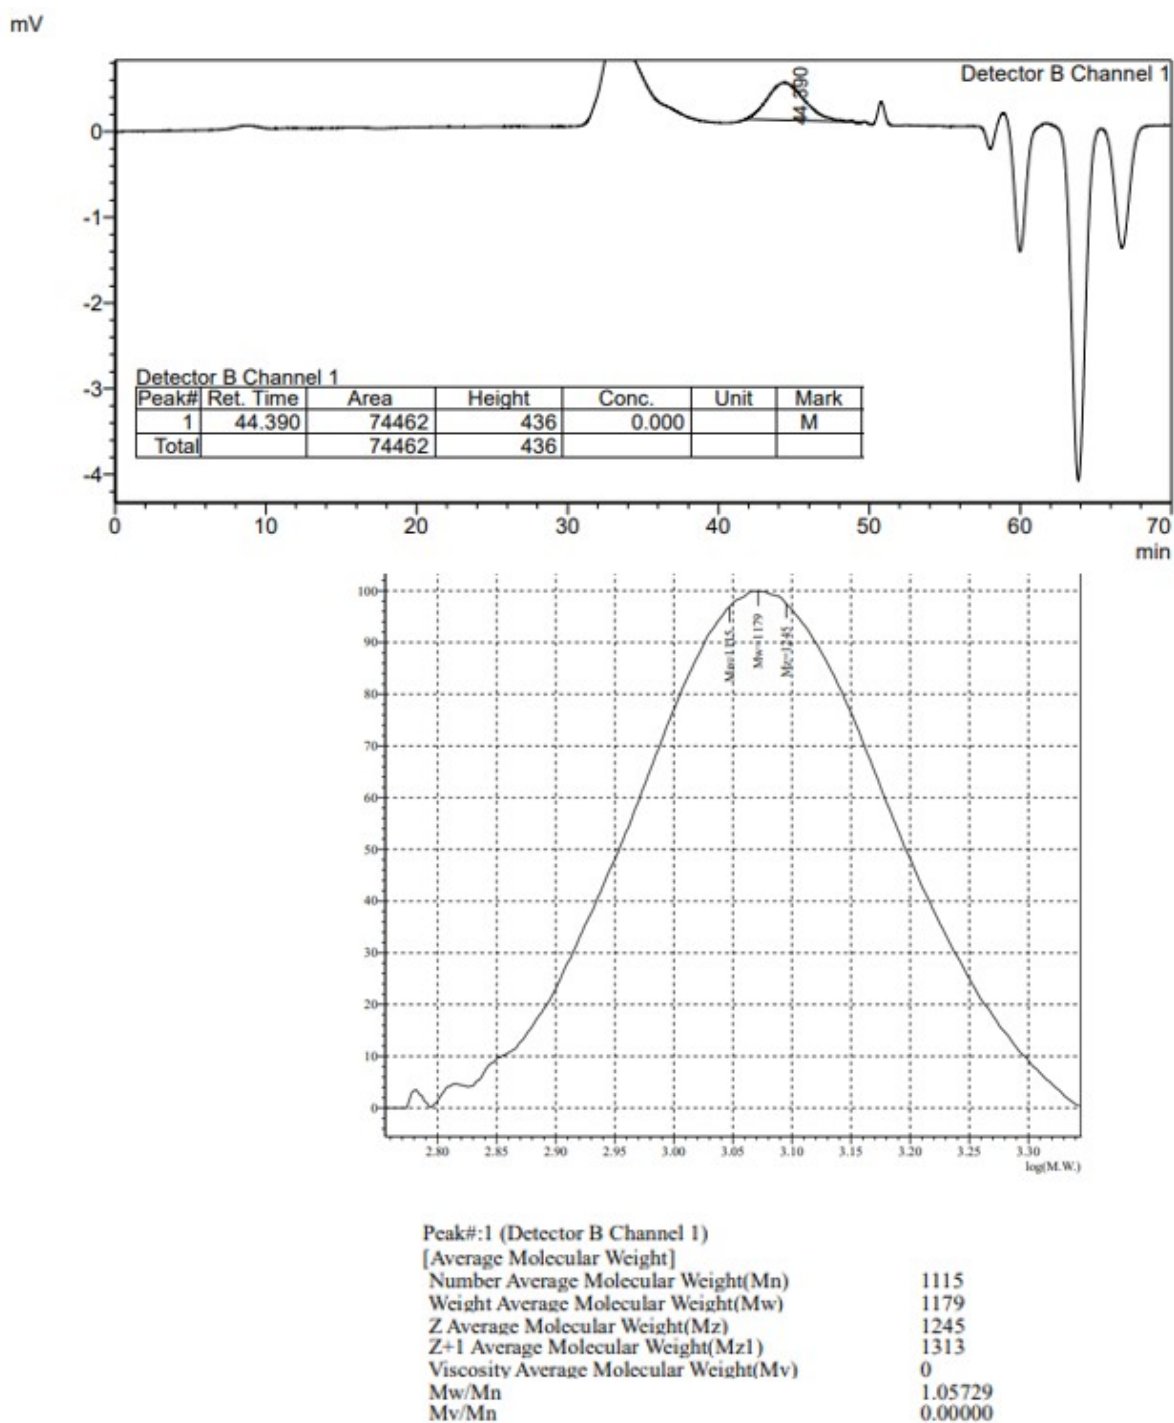

**Figure S7.** An example of a GPC chromatogram and associated data of Gelest elastomer Part A using the refractive index signal as a function of retention time

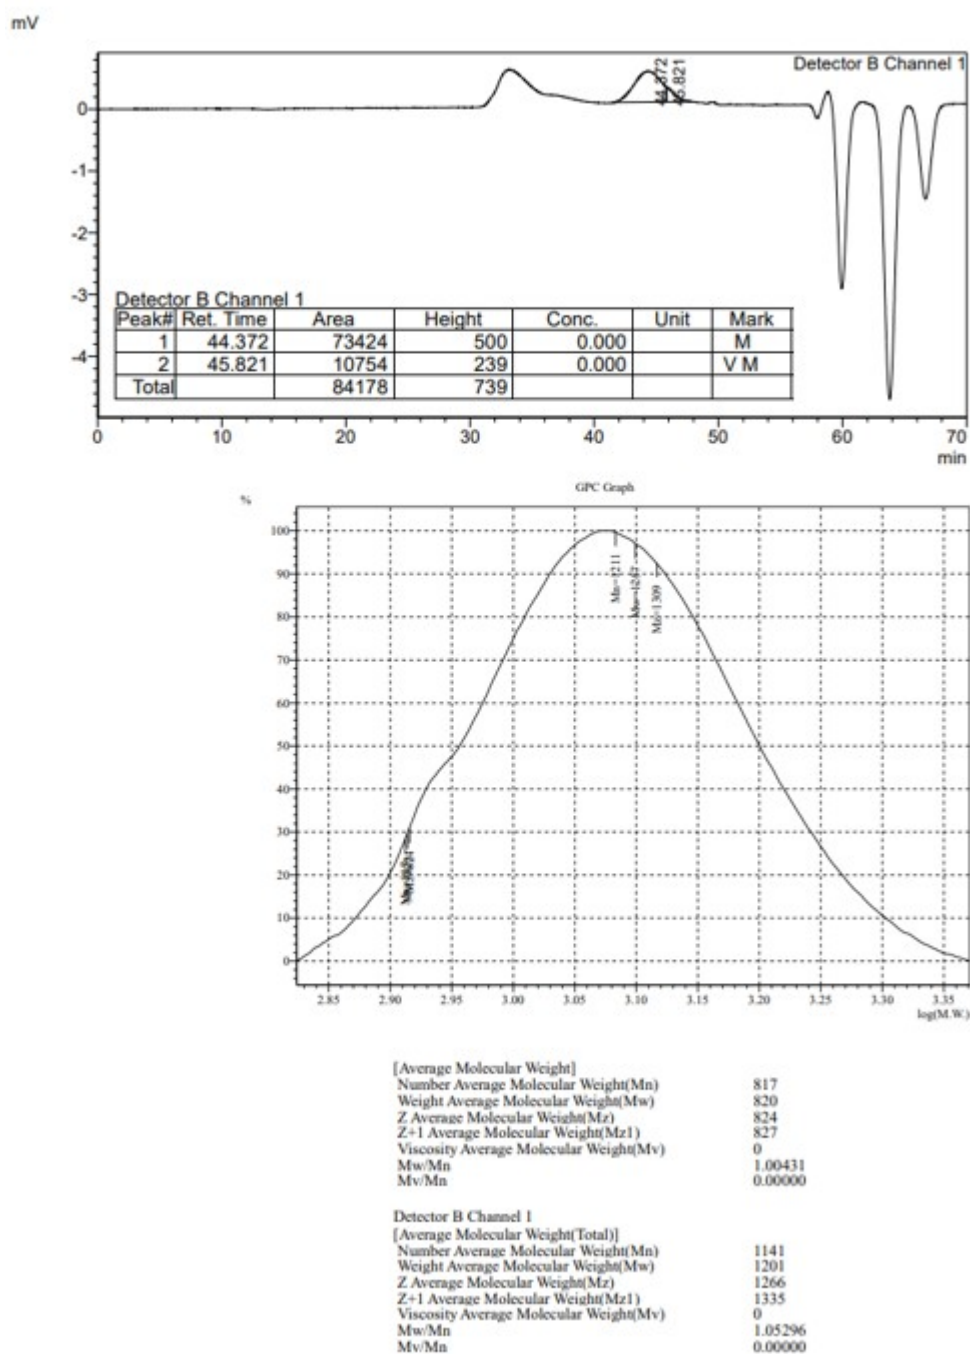

**Figure S8.** An example of a GPC chromatogram and associated data of Gelest elastomer Part B using the refractive index signal as a function of retention time.

**Table S1.** DP<sub>n</sub> determined using NMR spectroscopy as compared to GPC

|              | NM<br>R         | GPC             |                     |                     |                |
|--------------|-----------------|-----------------|---------------------|---------------------|----------------|
| Polymer      | DP <sub>n</sub> | DP <sub>n</sub> | M <sub>w</sub> [Da] | M <sub>n</sub> [Da] | D              |
| Vinyl PDMS   | 16              | 14              | 1199.4 ± 12.36      | 1137.4 ± 12.70      | 1.054 ± 0.0037 |
| PHMS-co-PDMS | 4:12            | 4:8 or 3:9      | 816.6 ± 3.05        | 812.6 ± 4.04        | 1.005 ± 0.0006 |

## S2. Characterisation of X-poly(siloxane-*r*-S)

**Table S2.** Elemental analysis of X-poly(siloxane-*r*-S)

| Name                           | Method  | N [%] | C [%] | H [%] | S [%]  | Predicted [S%] |
|--------------------------------|---------|-------|-------|-------|--------|----------------|
| 0-poly(siloxane- <i>r</i> -S)  | 5mg 90s | 0     | 29.38 | 7.737 | 0      | 0              |
| 5-poly(siloxane- <i>r</i> -S)  | 5mg 90s | 0     | 30.86 | 8.046 | 1.985  | 4.99           |
| 10-poly(siloxane- <i>r</i> -S) | 5mg 90s | 0     | 31.81 | 8.13  | 2.117  | 9.91           |
| 15-poly(siloxane- <i>r</i> -S) | 5mg 90s | 0     | 28.02 | 7.216 | 11.985 | 14.16          |

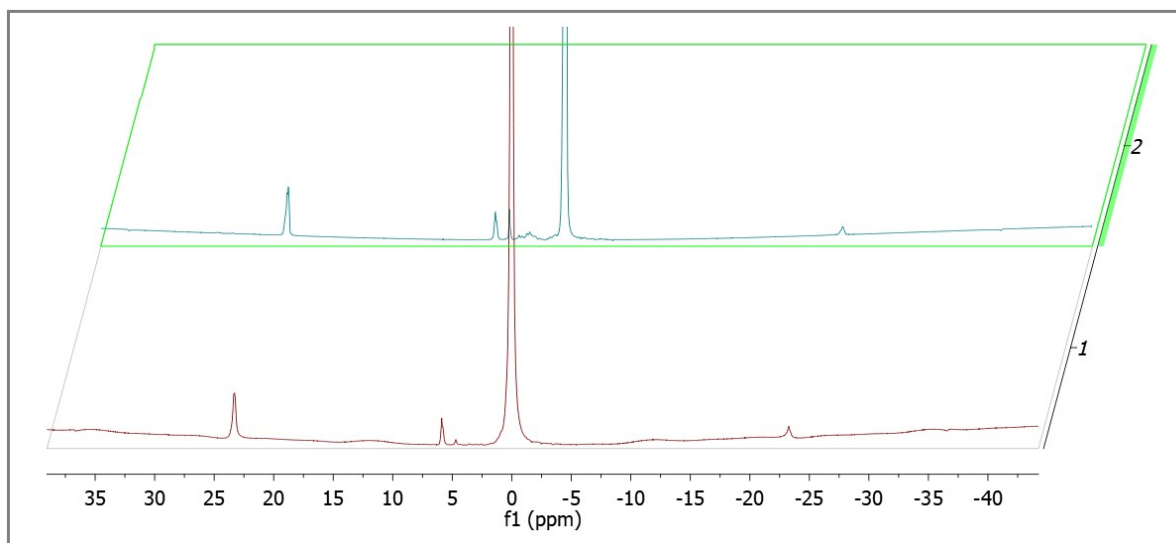

**Figure S9.** SS<sup>1</sup>H NMR spectra of 0-poly(siloxane-*r*-S) (red) and 10-poly(siloxane-*r*-S) (blue)

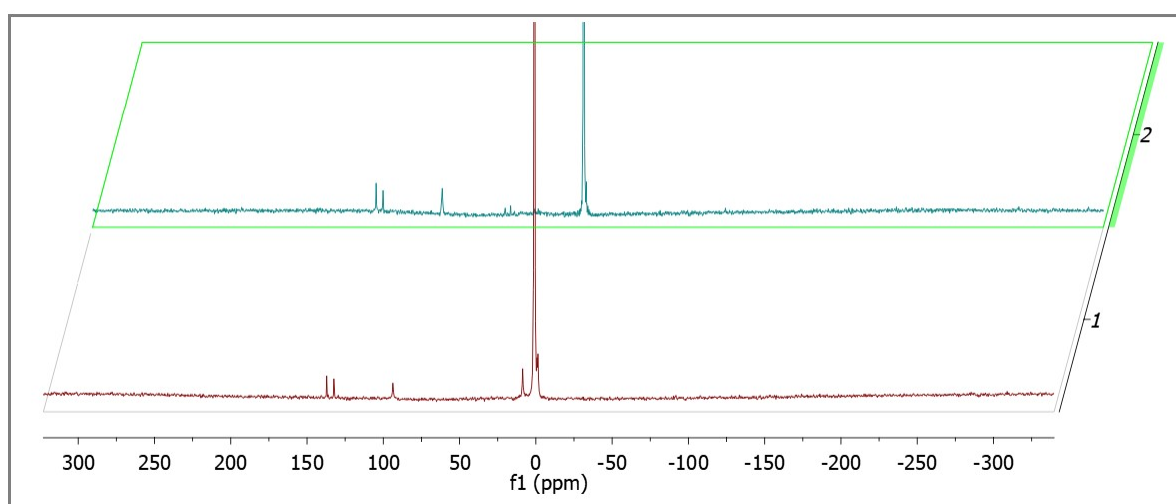

**Figure S10.** SS<sup>13</sup>C NMR spectra of 0-poly(siloxane-*r*-S) (red) and 10-poly(siloxane-*r*-S) (blue)



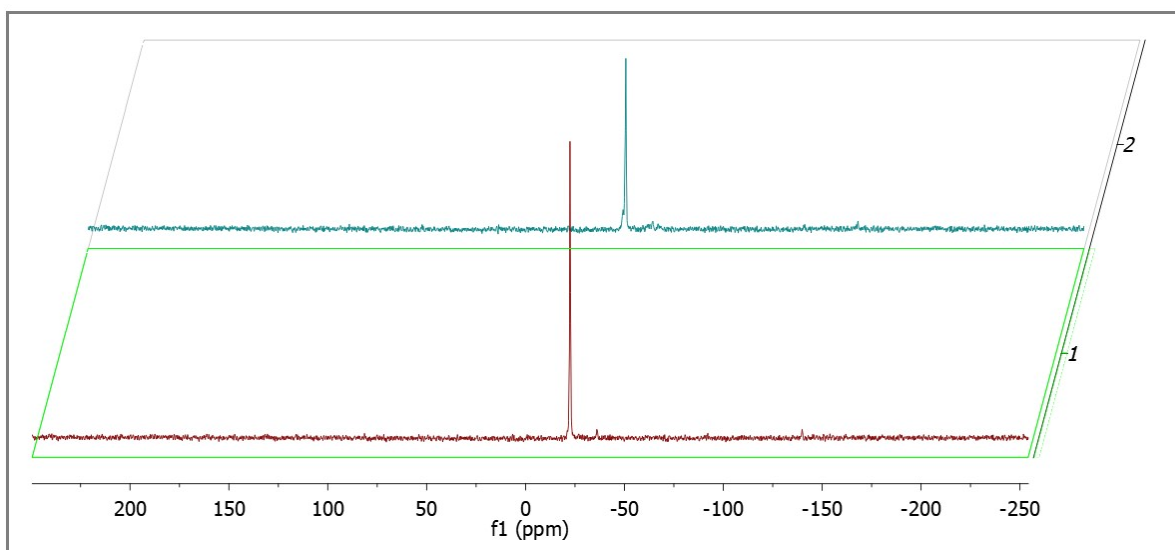

**Figure S11.**  $^{29}\text{Si}$  NMR spectra of 0-poly(siloxane-*r*-S) (red) and 10-poly(siloxane-*r*-S) (blue)

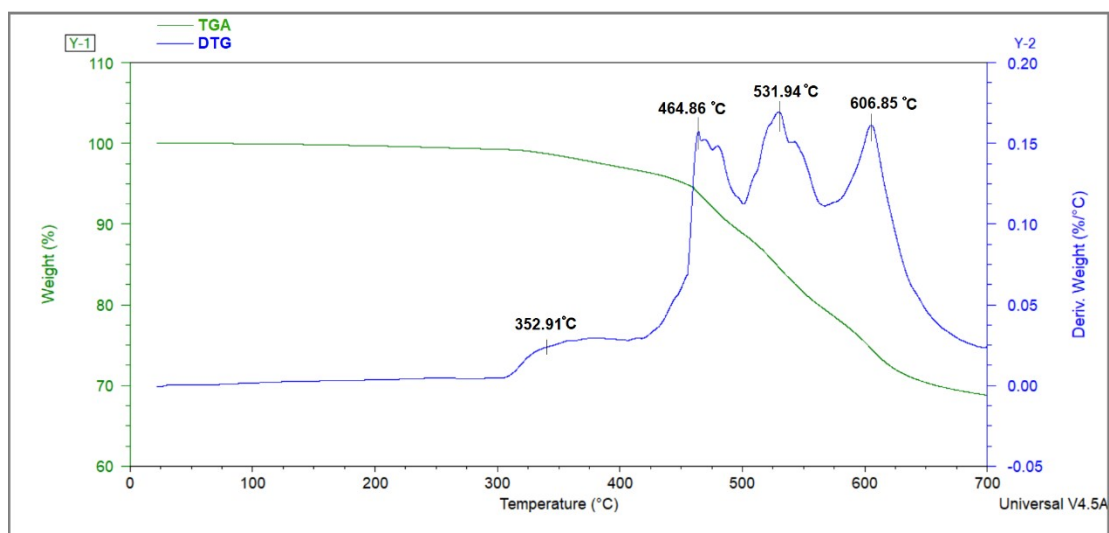

**Figure S12.** TGA (green, left) and DTG (blue, right) thermogram of 0-poly(siloxane-*r*-S)

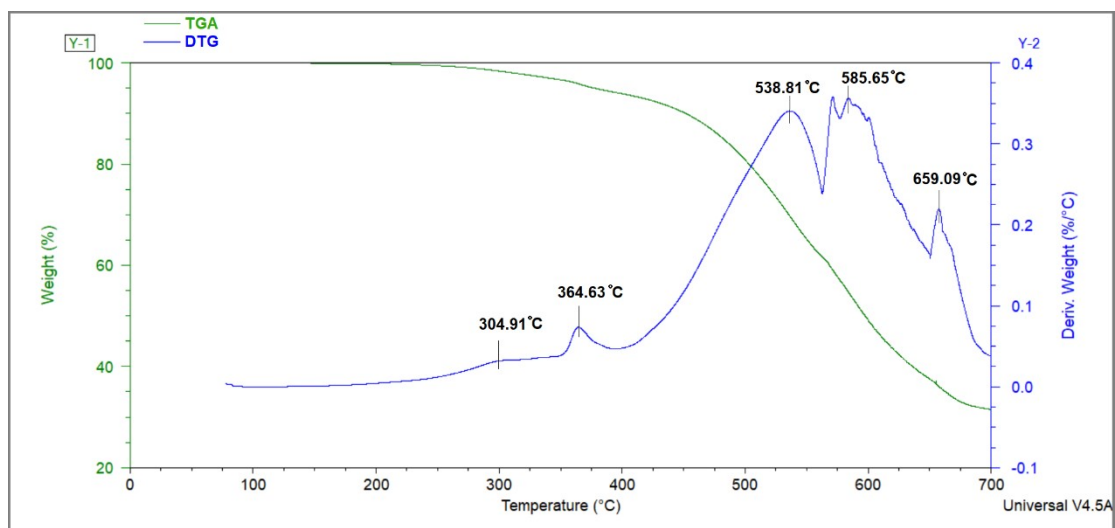

**Figure S13.** TGA (green, left) and DTG (blue, right) thermograms of 5-poly(siloxane-*r*-S)

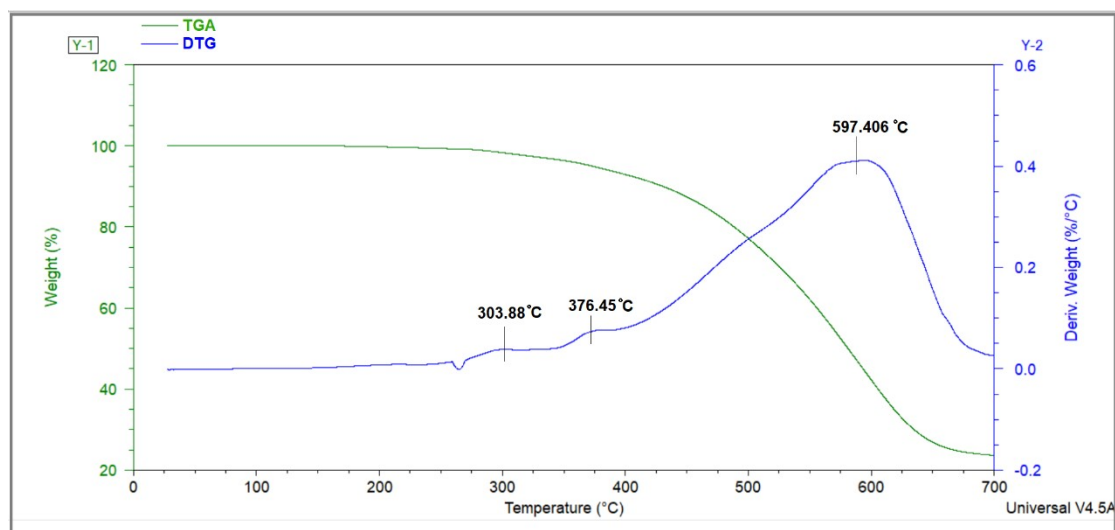

**Figure S14.** TGA (green, left) and DTG (blue, right) thermogram of 10-poly(siloxane-*r*-S)

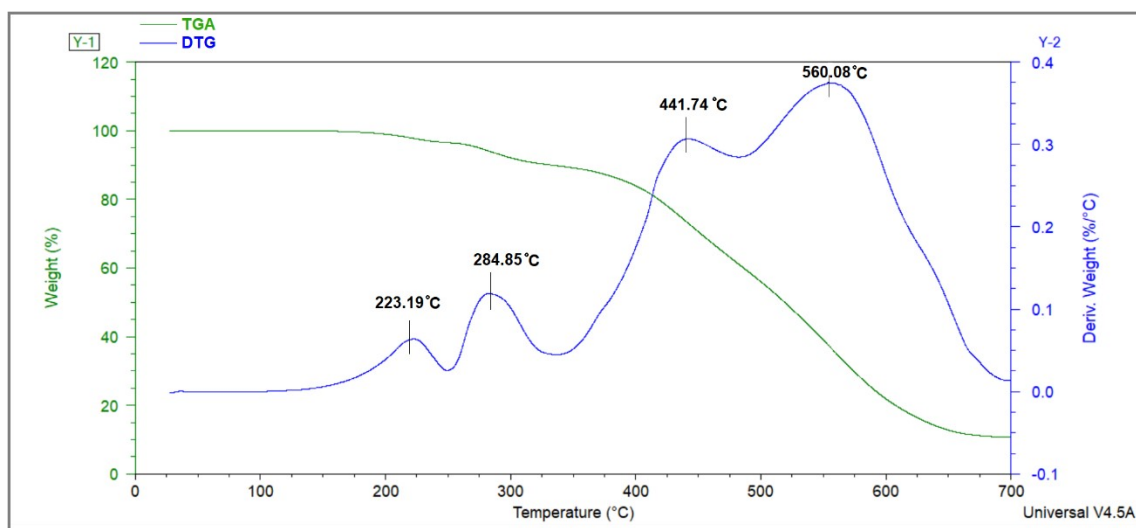

**Figure S15.** TGA (green, left) and DTG (blue, right) thermogram of 15-poly(siloxane-*r*-S)

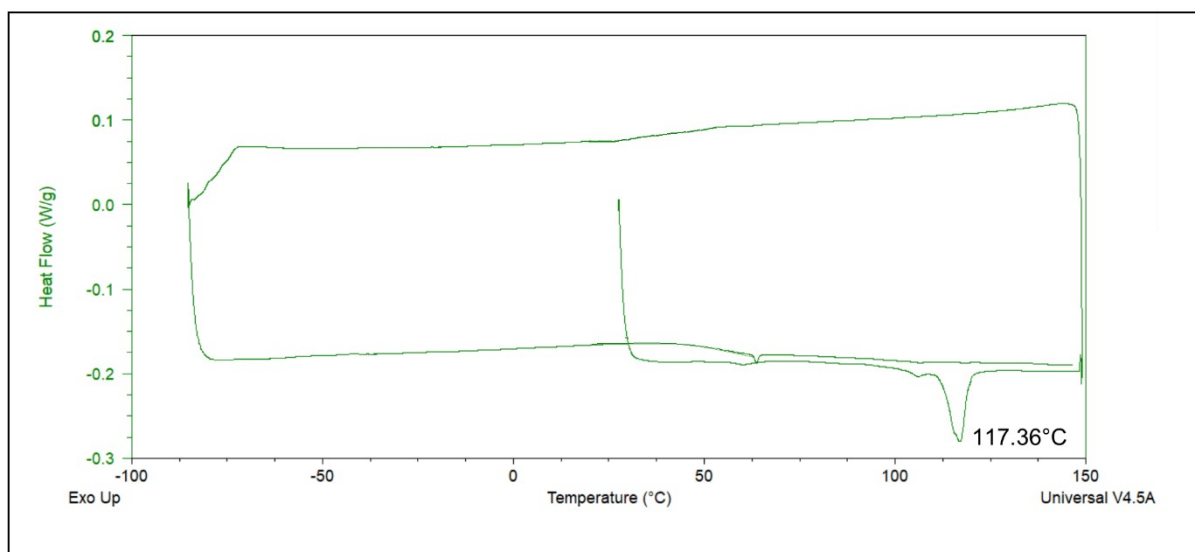

**Figure S16.** DSC thermogram of 15-poly(siloxane-*r*-S) sample showing no  $T_g$  and an endothermic peak corresponding to elemental sulfur

#### S4. Characterisation and property comparison of X-poly(siloxane-*r*-S) (X = 0, 5, 10) before and after healing

#### S5. Solubility assessment of X-poly(siloxane-*r*-S)

We conducted solubility tests on both the control sample 0-poly(siloxane-*r*-S) and the sulfur-containing samples X-poly(siloxane-*r*-S) (X = 5, 10, 15). Due to the clear and transparent nature of the control sample, it was necessary to use quantitative tests to assess its solubility. For the samples containing sulfur, visual observations were mainly employed to evaluate the solubility.

##### Control sample 0-poly(siloxane-*r*-S) solubility:

The control sample showed signs of swelling in DCM, THF, and Hexane. This indicates some interaction with these solvents.

The solubility rates in the tested solvents were: THF (0.20%), DMF (0.10%), Hexane (0.21%), DCM (0.23%), and Acetone (0.12%). These findings suggest limited solubility, likely due to the silicone's cross-linked structure.

##### X-poly(siloxane-*r*-S) solubility:

Samples with sulfur were partially soluble in DMF, indicating some breakdown of the sulfide bonds within the material using this solvent.<sup>1</sup>

Like the control sample, sulfur-containing samples also swelled in DCM, THF, and Hexane, showing a similar interaction pattern across all samples.

These samples did not show any solubility in the solvents, except for DMF, showing a unique behavior compared to the control sample (Table S3, Figure S18).

**Table S3.** Solubility of X-poly(siloxane-*r*-S) compared with 0-poly(siloxane-*r*-S)

|                                | THF | DMF | Hexane | DCM | Acetone |
|--------------------------------|-----|-----|--------|-----|---------|
| 0-poly(siloxane- <i>r</i> -S)  | Sw  | Sw  | Sw     | Sw  | Sw      |
| 5-poly(siloxane- <i>r</i> -S)  | Sw  | P   | Sw     | Sw  | Sw      |
| 10-poly(siloxane- <i>r</i> -S) | Sw  | P   | Sw     | Sw  | Sw      |
| 15-poly(siloxane- <i>r</i> -S) | Sw  | P   | Sw     | Sw  | Sw      |

S = soluble; I = insoluble; P = partially soluble; Sw = swells

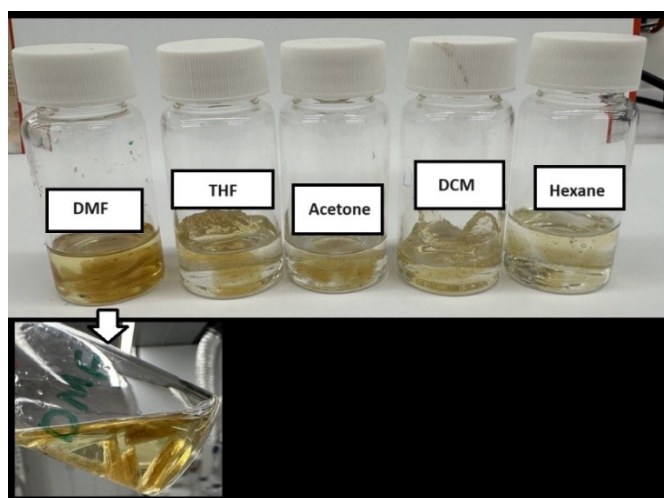

**Figure S17.** Solubility of X-poly(siloxane-*r*-S) in various solvents

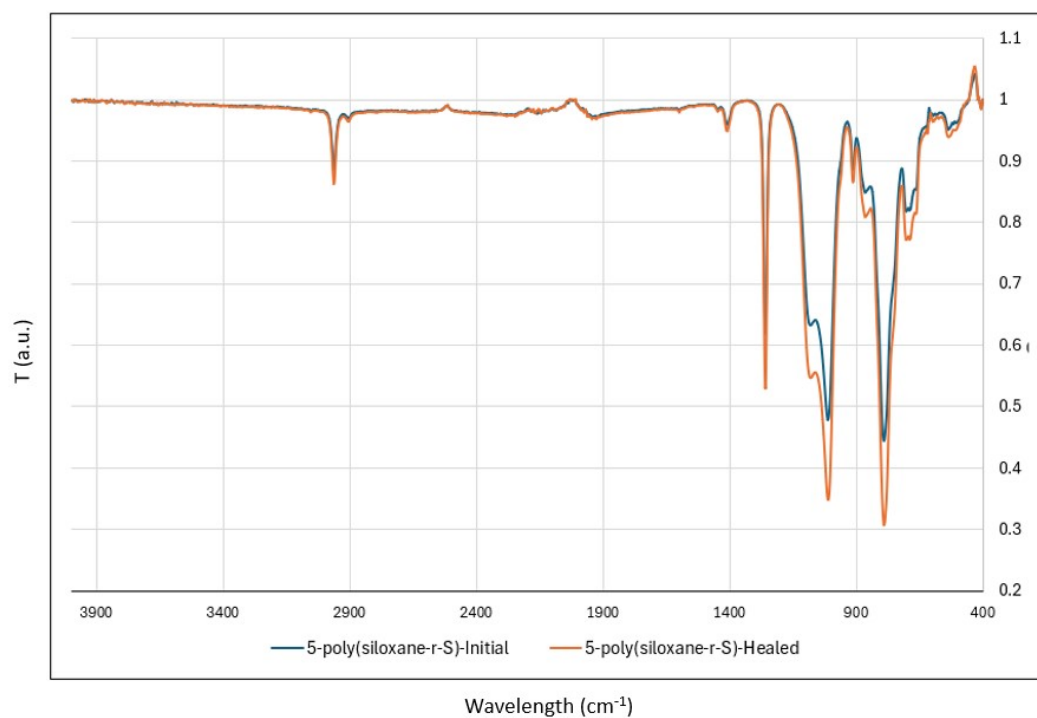

**Figure S18.** FTIR spectra for initial (blue) and healed (orange) samples of 5-poly(siloxane-*r*-S)

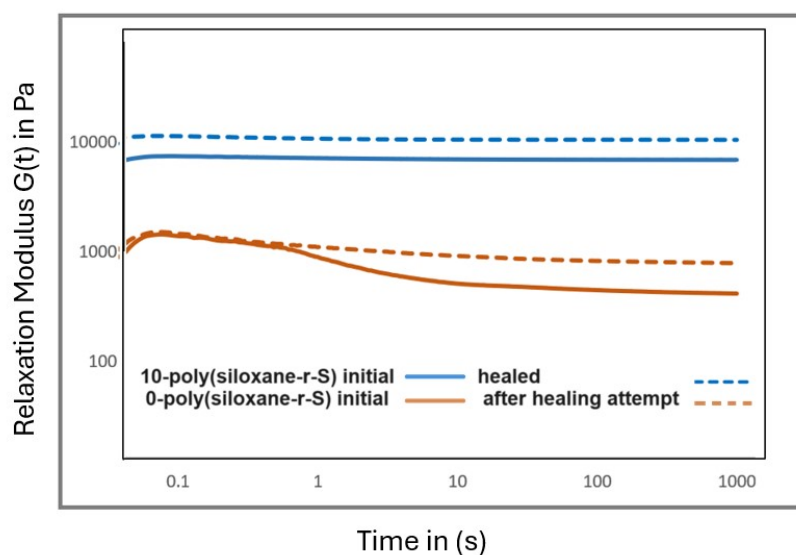

**Figure S19.** Relaxation modulus of 10-poly(siloxane-*r*-S) before (solid blue line) and after (dotted blue line) healing as compared to 0-poly(siloxane-*r*-S) before (solid brown line) and after healing attempt (dotted brown line).

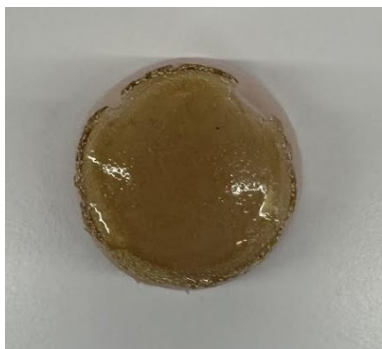

**Figure S20.** Image of Part A (vinyl-terminated PDMS) after inverse vulcanisation with 10 wt% sulfur at 180°C.

#### References:

- (1) Yan, P.; Zhao, W.; Tonkin, S. J.; Chalker, J. M.; Schiller, T. L.; Hasell, T. Stretchable and Durable Inverse Vulcanized Polymers with Chemical and Thermal Recycling. *Chem. Mater.* **2022**, *34* (3), 1167–1178. <https://doi.org/10.1021/acs.chemmater.1c03662>.
